# Supplementary material for: Do Current Smokers and Ex-Smokers Who Use Nicotine Vaping Products Daily Versus Weekly Differ on Their Reasons for Vaping? Findings from the 2020 ITC Four Country Smoking and Vaping Survey
Source: MDPI journal article supplement (doi:10.3390/ijerph192114130), 2022-10-29
Supplement: s1 [file s1]

**Figure S1.** Study flow diagram (4CV3, 2020)

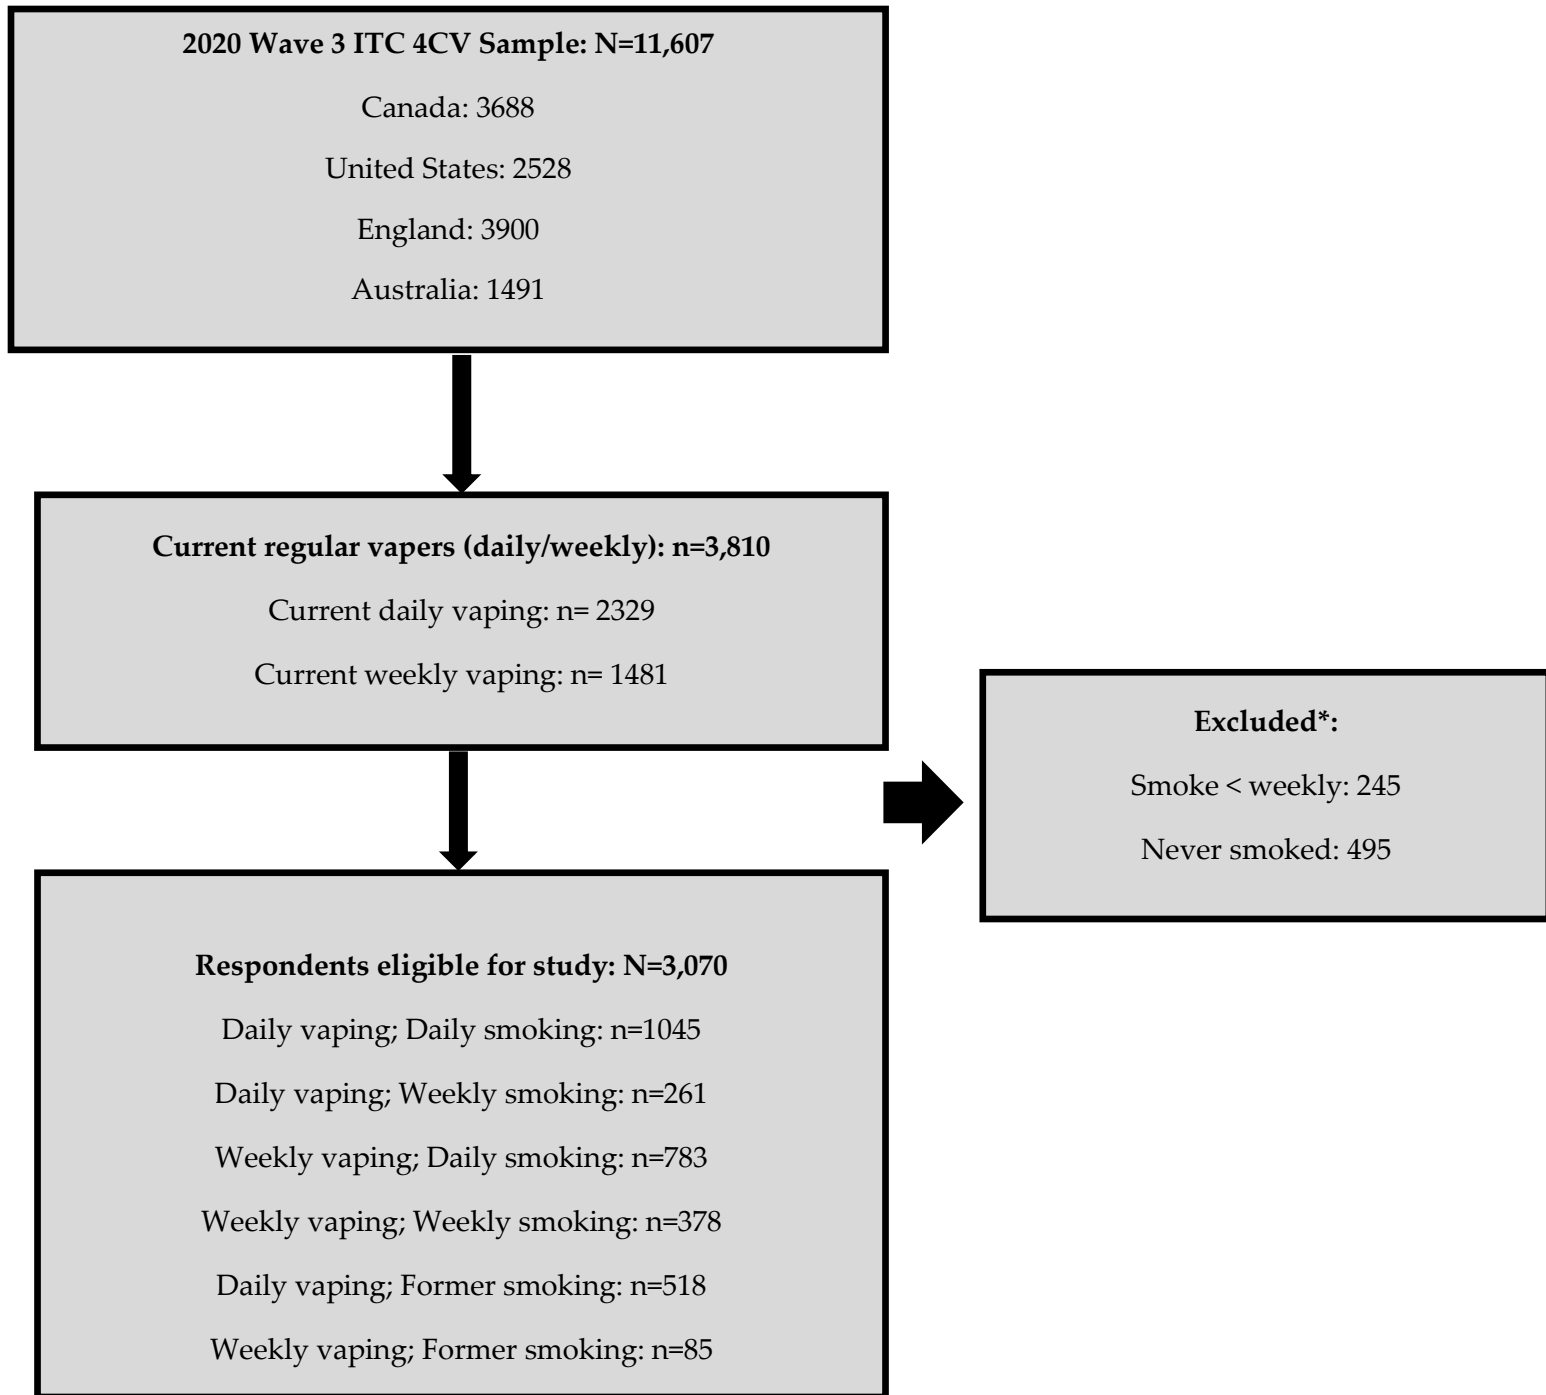

**Supplemental Table S1.** Reasons for vaping among daily/weekly vapers (current smokers and ex-smokers): ITC 4CV 2016 and 2020

|                                                               | <b>2016*</b>           |                   | <b>2020</b>            |                   |
|---------------------------------------------------------------|------------------------|-------------------|------------------------|-------------------|
|                                                               | Weighted %             |                   | Weighted %             |                   |
|                                                               | <b>Current smokers</b> | <b>Ex-smokers</b> | <b>Current smokers</b> | <b>Ex-smokers</b> |
| Vaping is less harmful to me than smoking                     | Not assessed           |                   | 70.9                   | 92.7              |
| Vaping is less harmful than smoking to other people around me | 77.9                   | 90.0              | 74.5                   | 85.0              |
| I enjoy vaping                                                | 69.6                   | 90.6              | 78.2                   | 93.7              |
| I save money by vaping instead of smoking                     | 68.3                   | 89.5              | 67.0                   | 89.7              |
| I like the e-liquid flavours                                  | Not assessed           |                   | 71.9                   | 78.9              |
| Vaping is more acceptable than smoking                        | 74.3                   | 78.6              | 69.9                   | 65.6              |
| I can vape in places where I can't smoke                      | 66.5                   | 66.3              | 65.5                   | 60.3              |
| Vaping helps me cut down on the number of cigarettes I smoke  | 85.6                   | —                 | 81.3                   | —                 |
| Vaping might help me stop smoking cigarettes                  | 77.4                   | —                 | 73.0                   | —                 |
| Vaping might help me stay quit from smoking cigarettes        | —                      | 88.3              | —                      | 92.3              |

Surveys

\*Published: Yong HH, Borland R, Cummings KM, Gravely S, Thrasher JF, McNeill A, Hitchman S, Greenhalgh E, Thompson ME, Fong GT. Reasons for regular vaping and for its discontinuation among smokers and recent ex-smokers: findings from the 2016 ITC Four Country Smoking and Vaping Survey. *Addiction*. 2019 Oct;114 Suppl 1(Suppl 1):35-48.

**Supplemental Table S2.** Logistic regression models on reasons for vaping among current smokers

| n=2467                                                        |               | % yes (weighted) | 95% CI    | P-value<br>(main effect) |
|---------------------------------------------------------------|---------------|------------------|-----------|--------------------------|
| Vaping is less harmful to me than smoking                     |               |                  |           |                          |
| Vaping frequency                                              | Daily         | 73.9             | 70.2-77.3 | 0.01                     |
|                                                               | Weekly        | 67.3             | 63.5-70.9 |                          |
| Age                                                           | 18-39         | 69.4             | 65.9-72.6 | 0.21                     |
|                                                               | 40+           | 72.7             | 68.6-76.4 |                          |
| Sex                                                           | Female        | 70.3             | 66.2-74.1 | 0.70                     |
|                                                               | Male          | 71.3             | 67.8-74.6 |                          |
| Income                                                        | Low           | 65.8             | 60.1-71.1 | 0.01                     |
|                                                               | Moderate/high | 72.9             | 69.9-75.7 |                          |
|                                                               | Not reported  | 53.6             | 36.2-70.2 |                          |
| Education                                                     | Low           | 72.7             | 66.0-78.5 | 0.27                     |
|                                                               | Moderate/high | 70.9             | 68.0-73.6 |                          |
|                                                               | Not reported  | 51.7             | 27.3-75.2 |                          |
| Country                                                       | Australia     | 78.7             | 68.7-86.2 | 0.03                     |
|                                                               | Canada        | 70.3             | 66.5-73.9 |                          |
|                                                               | England       | 73.0             | 68.7-76.9 |                          |
|                                                               | US            | 63.4             | 56.7-69.6 |                          |
| Smoking frequency                                             | Daily         | 69.3             | 66.3-72.1 | 0.04                     |
|                                                               | Weekly        | 75.9             | 70.3-80.7 |                          |
| Vaping is less harmful than smoking to other people around me |               |                  |           |                          |
| Vaping frequency                                              | Daily         | 77.4             | 74.0-80.6 | 0.01                     |
|                                                               | Weekly        | 70.8             | 67.0-74.4 |                          |
| Age                                                           | 18-39         | 69.8             | 66.3-73.1 | <0.01                    |
|                                                               | 40+           | 79.4             | 75.7-82.7 |                          |
| Sex                                                           | Female        | 78.2             | 74.4-81.5 | 0.01                     |
|                                                               | Male          | 71.6             | 68.1-74.8 |                          |
| Income                                                        | Low           | 73.7             | 68.3-78.5 | 0.07                     |
|                                                               | Moderate/high | 75.2             | 72.2-78.0 |                          |
|                                                               | Not reported  | 56.4             | 38.7-72.5 |                          |
| Education                                                     | Low           | 72.3             | 64.9-78.6 | 0.50                     |
|                                                               | Moderate/high | 75.0             | 72.2-77.6 |                          |
|                                                               | Not reported  | 62.9             | 34.6-84.5 |                          |
| Country                                                       | Australia     | 83.9             | 74.6-90.2 | 0.12                     |
|                                                               | Canada        | 75.4             | 71.8-78.6 |                          |
|                                                               | England       | 73.6             | 69.3-77.5 |                          |
|                                                               | US            | 70.9             | 64.3-76.8 |                          |
| Smoking frequency                                             | Daily         | 72.7             | 69.7-75.5 | 0.02                     |
|                                                               | Weekly        | 79.8             | 74.7-84.1 |                          |
| I enjoy vaping                                                |               |                  |           |                          |
| Vaping frequency                                              | Daily         | 83.6             | 80.5-86.4 | <0.001                   |
|                                                               | Weekly        | 70.8             | 67.0-74.4 |                          |
| Age                                                           | 18-39         | 78.5             | 75.2-81.4 | 0.85                     |
|                                                               | 40+           | 78.0             | 74.1-81.4 |                          |
| Sex                                                           | Female        | 77.7             | 73.6-81.2 | 0.69                     |
|                                                               | Male          | 78.7             | 75.4-81.6 |                          |

| n=2467                                    |               | % yes (weighted) | 95% CI    | P-value<br>(main effect) |
|-------------------------------------------|---------------|------------------|-----------|--------------------------|
| Income                                    | Low           | 76.8             | 71.3-81.5 | 0.53                     |
|                                           | Moderate/high | 78.4             | 75.5-81.1 |                          |
|                                           | Not reported  | 86.1             | 66.8-95.0 |                          |
| Education                                 | Low           | 80.7             | 74.0-86.0 | 0.32                     |
|                                           | Moderate/high | 78.0             | 75.3-80.5 |                          |
|                                           | Not reported  | 62.9             | 35.5-83.9 |                          |
| Country                                   | Australia     | 78.7             | 67.7-86.7 | 0.01                     |
|                                           | Canada        | 83.6             | 80.5-86.3 |                          |
|                                           | England       | 75.8             | 71.5-79.6 |                          |
|                                           | US            | 76.2             | 69.8-81.6 |                          |
| Smoking frequency                         | Daily         | 76.8             | 73.9-79.4 | 0.04                     |
|                                           | Weekly        | 82.6             | 77.6-86.7 |                          |
| I save money by vaping instead of smoking |               |                  |           |                          |
| Vaping frequency                          | Daily         | 74.1             | 70.6-77.2 | <0.001                   |
|                                           | Weekly        | 58.3             | 54.2-62.3 |                          |
| Age                                       | 18-39         | 62.0             | 58.4-65.5 | <0.001                   |
|                                           | 40+           | 72.5             | 68.5-76.2 |                          |
| Sex                                       | Female        | 71.5             | 67.5-75.1 | <0.01                    |
|                                           | Male          | 63.6             | 59.9-67.1 |                          |
| Income                                    | Low           | 65.7             | 59.9-71.2 | 0.34                     |
|                                           | Moderate/high | 67.8             | 64.6-70.8 |                          |
|                                           | Not reported  | 54.6             | 36.0-72.0 |                          |
| Education                                 | Low           | 74.2             | 67.4-79.9 | 0.04                     |
|                                           | Moderate/high | 66.0             | 63.0-68.9 |                          |
|                                           | Not reported  | 45.8             | 18.4-76.1 |                          |
| Country                                   | Australia     | 82.4             | 73.3-88.8 | 0.001                    |
|                                           | Canada        | 66.4             | 62.4-70.2 |                          |
|                                           | England       | 67.9             | 63.6-72.0 |                          |
|                                           | US            | 58.1             | 51.2-64.8 |                          |
| Smoking frequency                         | Daily         | 67.2             | 64.1-70.1 | 0.79                     |
|                                           | Weekly        | 66.3             | 60.6-71.6 |                          |
| I like the e-liquid flavours              |               |                  |           |                          |
| Vaping frequency                          | Daily         | 75.4             | 71.9-78.6 | <0.01                    |
|                                           | Weekly        | 67.5             | 63.6-71.3 |                          |
| Age                                       | 18-39         | 74.8             | 71.4-77.9 | 0.01                     |
|                                           | 40+           | 68.1             | 63.9-72.0 |                          |
| Sex                                       | Female        | 71.9             | 67.7-75.8 | 0.98                     |
|                                           | Male          | 71.8             | 68.4-75.0 |                          |
| Income                                    | Low           | 71.9             | 66.2-77.0 | 0.27                     |
|                                           | Moderate/high | 72.3             | 69.2-75.1 |                          |
|                                           | Not reported  | 56.7             | 36.5-74.9 |                          |
| Education                                 | Low           | 76.2             | 69.5-81.9 | 0.35                     |
|                                           | Moderate/high | 71.2             | 68.3-73.9 |                          |
|                                           | Not reported  | 64.9             | 35.6-86.1 |                          |
| Country                                   | Australia     | 76.1             | 66.7-83.5 | 0.05                     |
|                                           | Canada        | 75.1             | 71.3-78.6 |                          |
|                                           | England       | 72.1             | 67.7-76.0 |                          |
|                                           | US            | 65.4             | 58.6-71.7 |                          |
| Smoking frequency                         | Daily         | 70.0             | 66.9-72.9 | 0.02                     |

| n=2467                                                       |               | % yes (weighted) | 95% CI    | P-value<br>(main effect) |
|--------------------------------------------------------------|---------------|------------------|-----------|--------------------------|
| Weekly                                                       |               | 77.6             | 72.3-82.1 |                          |
| Vaping is more acceptable than smoking                       |               |                  |           |                          |
| Vaping frequency                                             | Daily         | 72.2             | 68.6-75.6 | 0.06                     |
|                                                              | Weekly        | 67.3             | 63.4-71.0 |                          |
| Age                                                          | 18-39         | 67.3             | 63.7-70.6 | 0.03                     |
|                                                              | 40+           | 73.0             | 69.0-76.6 |                          |
| Sex                                                          | Female        | 72.5             | 68.4-76.2 | 0.10                     |
|                                                              | Male          | 68.1             | 64.5-71.4 |                          |
| Income                                                       | Low           | 70.8             | 65.3-75.9 | 0.83                     |
|                                                              | Moderate/high | 69.8             | 66.7-72.7 |                          |
|                                                              | Not reported  | 65.3             | 45.1-81.1 |                          |
| Education                                                    | Low           | 66.3             | 58.8-73.1 | 0.20                     |
|                                                              | Moderate/high | 70.8             | 67.9-73.5 |                          |
|                                                              | Not reported  | 49.3             | 22.0-77.1 |                          |
| Country                                                      | Australia     | 72.0             | 61.9-80.2 | 0.27                     |
|                                                              | Canada        | 66.8             | 62.8-70.5 |                          |
|                                                              | England       | 69.6             | 65.2-73.6 |                          |
|                                                              | US            | 73.5             | 66.9-79.1 |                          |
| Smoking frequency                                            | Daily         | 69.7             | 66.6-72.6 | 0.70                     |
|                                                              | Weekly        | 70.9             | 65.4-75.7 |                          |
| I can vape in places where I can't smoke                     |               |                  |           |                          |
| Vaping frequency                                             | Daily         | 67.2             | 63.5-70.8 | 0.18                     |
|                                                              | Weekly        | 63.6             | 59.6-67.4 |                          |
| Age                                                          | 18-39         | 62.2             | 58.6-65.7 | 0.01                     |
|                                                              | 40+           | 69.4             | 65.3-73.2 |                          |
| Sex                                                          | Female        | 68.9             | 64.7-72.7 | 0.03                     |
|                                                              | Male          | 63.0             | 59.4-66.5 |                          |
| Income                                                       | Low           | 65.4             | 59.6-70.7 | 0.90                     |
|                                                              | Moderate/high | 65.7             | 62.4-68.8 |                          |
|                                                              | Not reported  | 61.9             | 44.5-76.7 |                          |
| Education                                                    | Low           | 59.1             | 51.5-66.4 | 0.07                     |
|                                                              | Moderate/high | 66.8             | 63.9-69.6 |                          |
|                                                              | Not reported  | 47.2             | 22.3-73.6 |                          |
| Country                                                      | Australia     | 59.3             | 48.7-69.0 | <0.001                   |
|                                                              | Canada        | 58.5             | 54.4-62.4 |                          |
|                                                              | England       | 65.1             | 60.6-69.3 |                          |
|                                                              | US            | 75.6             | 69.6-80.7 |                          |
| Smoking frequency                                            | Daily         | 65.9             | 62.8-68.9 | 0.60                     |
|                                                              | Weekly        | 64.2             | 58.5-69.6 |                          |
| Vaping helps me cut down on the number of cigarettes I smoke |               |                  |           |                          |
| Vaping frequency                                             | Daily         | 85.1             | 82.2-87.6 | <0.001                   |
|                                                              | Weekly        | 76.2             | 72.3-79.6 |                          |
| Age                                                          | 18-39         | 75.6             | 72.3-78.7 | <0.001                   |
|                                                              | 40+           | 86.7             | 83.4-89.4 |                          |
| Sex                                                          | Female        | 84.9             | 81.5-87.8 | <0.01                    |
|                                                              | Male          | 78.3             | 75.0-81.3 |                          |
| Income                                                       | Low           | 81.8             | 76.8-85.9 | 0.96                     |
|                                                              | Moderate/high | 81.1             | 78.3-83.6 |                          |
|                                                              | Not reported  | 80.8             | 62.5-91.4 |                          |

| n=2467                            |               | % yes (weighted) | 95% CI    | P-value<br>(main effect) |
|-----------------------------------|---------------|------------------|-----------|--------------------------|
| Education                         | Low           | 85.8             | 79.8-90.2 | 0.12                     |
|                                   | Moderate/high | 80.7             | 78.0-83.0 |                          |
|                                   | Not reported  | 63.3             | 30.2-87.3 |                          |
| Country                           | Australia     | 87.7             | 78.7-93.2 | 0.28                     |
|                                   | Canada        | 82.4             | 79.2-85.2 |                          |
|                                   | England       | 80.4             | 76.4-83.8 |                          |
|                                   | US            | 78.9             | 72.6-84.0 |                          |
| Smoking frequency                 | Daily         | 80.4             | 77.6-82.9 | 0.14                     |
|                                   | Weekly        | 84.2             | 79.6-87.9 |                          |
| Vaping might help me quit smoking |               |                  |           |                          |
| Vaping frequency                  | Daily         | 76.7             | 73.2-79.8 | <0.01                    |
|                                   | Weekly        | 68.5             | 64.5-72.2 |                          |
| Age                               | 18-39         | 67.6             | 64.0-70.9 | <0.001                   |
|                                   | 40+           | 78.7             | 75.0-82.1 |                          |
| Sex                               | Female        | 76.2             | 72.3-79.7 | 0.03                     |
|                                   | Male          | 70.5             | 67.0-73.8 |                          |
| Income                            | Low           | 73.0             | 67.5-77.9 | 0.99                     |
|                                   | Moderate/high | 73.0             | 69.9-75.9 |                          |
|                                   | Not reported  | 72.0             | 54.1-84.9 |                          |
| Education                         | Low           | 76.9             | 70.1-82.6 | 0.36                     |
|                                   | Moderate/high | 72.5             | 69.6-75.2 |                          |
|                                   | Not reported  | 62.1             | 31.9-85.1 |                          |
| Country                           | Australia     | 79.8             | 70.2-86.9 | 0.11                     |
|                                   | Canada        | 75.3             | 71.6-78.6 |                          |
|                                   | England       | 72.6             | 68.4-76.5 |                          |
|                                   | US            | 67.9             | 60.9-74.2 |                          |
| Smoking frequency                 | Daily         | 71.6             | 68.6-74.5 | 0.05                     |
|                                   | Weekly        | 77.2             | 72.2-81.6 |                          |

CI: Confidence interval. US: United States. P-value is the main effect of each variable in the model (analysis of effects).

**Supplemental Table S3.** Logistic regression models on reasons for vaping among ex-smokers

| n=603                                                         |               | % yes (weighted) | 95% CI    | P-value<br>(main effect) |
|---------------------------------------------------------------|---------------|------------------|-----------|--------------------------|
| Vaping is less harmful to me than smoking                     |               |                  |           |                          |
| Vaping frequency                                              | Daily         | 93.7             | 90.1-96.1 | 0.02                     |
|                                                               | Weekly        | 84.0             | 71.2-91.7 |                          |
| Age                                                           | 18-39         | 90.7             | 83.5-95.0 | 0.28                     |
|                                                               | 40+           | 94.0             | 89.9-96.5 |                          |
| Sex                                                           | Female        | 89.8             | 85.1-93.1 | 0.11                     |
|                                                               | Male          | 94.1             | 89.4-96.8 |                          |
| Income                                                        | Low           | 92.6             | 88.0-95.5 | 0.98                     |
|                                                               | Moderate/high | 92.8             | 87.9-95.8 |                          |
|                                                               | Not reported  | 91.5             | 67.4-98.2 |                          |
| Education                                                     | Low           | 93.7             | 86.5-97.2 | 0.86                     |
|                                                               | Moderate/high | 92.2             | 87.9-95.1 |                          |
|                                                               | Not reported  | 94.6             | 61.3-99.5 |                          |
| Country                                                       | Australia     | 97.6             | 92.8-99.2 | 0.01                     |
|                                                               | Canada        | 92.0             | 83.8-96.3 |                          |
|                                                               | England       | 94.2             | 88.5-97.2 |                          |
|                                                               | US            | 85.0             | 76.5-90.7 |                          |
| Quit duration                                                 | > 2 years     | 94.7             | 90.5-97.1 | 0.07                     |
|                                                               | ≤ 2 years     | 90.3             | 85.0-93.9 |                          |
| Vaping is less harmful than smoking to other people around me |               |                  |           |                          |
| Vaping frequency                                              | Daily         | 86.3             | 80.3-90.6 | 0.14                     |
|                                                               | Weekly        | 76.8             | 62.6-86.7 |                          |
| Age                                                           | 18-39         | 87.1             | 77.3-93.0 | 0.47                     |
|                                                               | 40+           | 83.1             | 76.1-88.3 |                          |
| Sex                                                           | Female        | 86.9             | 79.4-91.9 | 0.45                     |
|                                                               | Male          | 83.7             | 76.4-89.0 |                          |
| Income                                                        | Low           | 75.6             | 64.3-84.2 | 0.05                     |
|                                                               | Moderate/high | 86.9             | 80.5-91.4 |                          |
|                                                               | Not reported  | 94.6             | 69.6-99.3 |                          |
| Education                                                     | Low           | 84.6             | 72.5-92.0 | 0.98                     |
|                                                               | Moderate/high | 85.2             | 79.4-89.6 |                          |
|                                                               | Not reported  | 82.5             | 37.7-97.4 |                          |
| Country                                                       | Australia     | 91.1             | 79.6-96.4 | 0.48                     |
|                                                               | Canada        | 88.0             | 77.5-94.0 |                          |
|                                                               | England       | 82.1             | 72.2-89.0 |                          |
|                                                               | US            | 84.8             | 76.3-90.6 |                          |
| Quit duration                                                 | > 2 years     | 88.3             | 81.7-92.8 | 0.09                     |
|                                                               | ≤ 2 years     | 81.6             | 74.3-87.3 |                          |
| I enjoy vaping                                                |               |                  |           |                          |
| Vaping frequency                                              | Daily         | 94.8             | 92.0-96.6 | 0.01                     |
|                                                               | Weekly        | 83.8             | 69.4-92.2 |                          |
| Age                                                           | 18-39         | 95.7             | 91.7-97.8 | 0.07                     |
|                                                               | 40+           | 91.3             | 87.3-94.2 |                          |
| Sex                                                           | Female        | 95.3             | 92.0-97.3 | 0.17                     |
|                                                               | Male          | 92.3             | 87.5-95.3 |                          |

| n=603                                     |               | % yes (weighted) | 95% CI      | P-value<br>(main effect) |
|-------------------------------------------|---------------|------------------|-------------|--------------------------|
| Income                                    | Low           | 91.3             | 84.9-95.1   | 0.33                     |
|                                           | Moderate/high | 94.9             | 91.4-97.0   |                          |
|                                           | Not reported  | 89.3             | 62.5-97.7   |                          |
| Education                                 | Low           | 94.7             | 86.1-98.1   | <0.001                   |
|                                           | Moderate/high | 88.3             | 83.4-91.9   |                          |
|                                           | Not reported  | 100.0            | 100.0-100.0 |                          |
| Country                                   | Australia     | 96.2             | 89.3-98.7   | 0.70                     |
|                                           | Canada        | 94.3             | 89.0-97.1   |                          |
|                                           | England       | 92.5             | 87.3-95.7   |                          |
|                                           | US            | 94.3             | 88.6-97.3   |                          |
| Quit duration                             | > 2 years     | 95.6             | 91.6-97.7   | 0.11                     |
|                                           | ≤ 2 years     | 91.5             | 86.9-94.6   |                          |
| I save money by vaping instead of smoking |               |                  |             |                          |
| Vaping frequency                          | Daily         | 90.5             | 86.3-93.6   | 0.18                     |
|                                           | Weekly        | 84.5             | 72.5-91.9   |                          |
| Age                                       | 18-39         | 86.0             | 77.6-91.7   | 0.09                     |
|                                           | 40+           | 92.2             | 87.9-95.1   |                          |
| Sex                                       | Female        | 88.2             | 80.7-93.1   | 0.45                     |
|                                           | Male          | 90.7             | 86.2-93.8   |                          |
| Income                                    | Low           | 92.0             | 86.7-95.3   | 0.18                     |
|                                           | Moderate/high | 87.5             | 81.3-91.8   |                          |
|                                           | Not reported  | 96.0             | 77.4-99.4   |                          |
| Education                                 | Low           | 91.1             | 82.3-95.8   | 0.37                     |
|                                           | Moderate/high | 90.1             | 85.8-93.2   |                          |
|                                           | Not reported  | 63.1             | 15.4-94.1   |                          |
| Country                                   | Australia     | 97.5             | 84.5-99.7   | 0.03                     |
|                                           | Canada        | 84.2             | 73.5-91.1   |                          |
|                                           | England       | 92.7             | 86.6-96.1   |                          |
|                                           | US            | 81.1             | 72.4-87.5   |                          |
| Quit duration                             | > 2 years     | 91.9             | 86.4-95.3   | 0.19                     |
|                                           | ≤ 2 years     | 87.5             | 81.7-91.7   |                          |
| I like the e-liquid flavours              |               |                  |             |                          |
| Vaping frequency                          | Daily         | 79.3             | 73.8--84.0  | 0.69                     |
|                                           | Weekly        | 76.5             | 60.3-87.4   |                          |
| Age                                       | 18-39         | 86.1             | 78.7-91.2   | <0.01                    |
|                                           | 40+           | 70.9             | 63.5-77.3   |                          |
| Sex                                       | Female        | 79.4             | 73.1-84.5   | 0.86                     |
|                                           | Male          | 78.6             | 71.0-84.6   |                          |
| Income                                    | Low           | 75.2             | 65.1-83.1   | 0.59                     |
|                                           | Moderate/high | 80.5             | 74.2-85.6   |                          |
|                                           | Not reported  | 78.1             | 55.7-91.0   |                          |
| Education                                 | Low           | 82.4             | 71.5-89.7   | 0.03                     |
|                                           | Moderate/high | 79.8             | 74.4-84.4   |                          |
|                                           | Not reported  | 26.1             | 5.3-68.8    |                          |
| Country                                   | Australia     | 80.6             | 65.8-90.0   | 0.49                     |
|                                           | Canada        | 75.1             | 63.0-84.3   |                          |
|                                           | England       | 82.0             | 74.5-87.7   |                          |
|                                           | US            | 75.1             | 65.6-82.6   |                          |
| Quit duration                             | > 2 years     | 79.3             | 70.5-86.0   | 0.90                     |
|                                           | ≤ 2 years     | 78.6             | 71.9-84.1   |                          |



| n=603                                                  |               | % yes (weighted) | 95% CI    | P-value<br>(main effect) |
|--------------------------------------------------------|---------------|------------------|-----------|--------------------------|
| Vaping is more acceptable than smoking                 |               |                  |           |                          |
| Vaping frequency                                       | Daily         | 65.0             | 58.5-70.9 | 0.64                     |
|                                                        | Weekly        | 68.9             | 53.3-81.1 |                          |
| Age                                                    | 18-39         | 68.1             | 58.0-76.8 | 0.47                     |
|                                                        | 40+           | 63.4             | 55.8-70.3 |                          |
| Sex                                                    | Female        | 66.4             | 58.3-73.7 | 0.80                     |
|                                                        | Male          | 65.0             | 56.8-72.4 |                          |
| Income                                                 | Low           | 61.5             | 50.2-71.7 | 0.17                     |
|                                                        | Moderate/high | 65.0             | 57.6-71.7 |                          |
|                                                        | Not reported  | 84.1             | 62.4-94.4 |                          |
| Education                                              | Low           | 66.6             | 54.8-76.6 | 0.97                     |
|                                                        | Moderate/high | 65.5             | 58.9-71.5 |                          |
|                                                        | Not reported  | 62.6             | 25.3-89.2 |                          |
| Country                                                | Australia     | 58.2             | 42.8-72.2 | 0.67                     |
|                                                        | Canada        | 62.5             | 51.4-72.4 |                          |
|                                                        | England       | 67.3             | 56.7-76.3 |                          |
|                                                        | US            | 67.5             | 58.0-75.8 |                          |
| Quit duration                                          | > 2 years     | 67.6             | 59.6-74.7 | 0.49                     |
|                                                        | ≤ 2 years     | 63.8             | 55.6-71.3 |                          |
| I can vape in places where I can't smoke               |               |                  |           |                          |
| Vaping frequency                                       | Daily         | 60.5             | 54.1-66.5 | 0.89                     |
|                                                        | Weekly        | 59.3             | 43.5-73.3 |                          |
| Age                                                    | 18-39         | 61.6             | 51.3-70.9 | 0.73                     |
|                                                        | 40+           | 59.2             | 51.2-66.7 |                          |
| Sex                                                    | Female        | 59.5             | 51.7-66.8 | 0.81                     |
|                                                        | Male          | 60.8             | 52.4-68.6 |                          |
| Income                                                 | Low           | 52.2             | 42.1-62.0 | 0.16                     |
|                                                        | Moderate/high | 62.8             | 55.2-69.7 |                          |
|                                                        | Not reported  | 69.9             | 44.7-87.0 |                          |
| Education                                              | Low           | 62.9             | 50.9-73.6 | 0.11                     |
|                                                        | Moderate/high | 61.6             | 55.1-67.7 |                          |
|                                                        | Not reported  | 21.3             | 5.0-58.3  |                          |
| Country                                                | Australia     | 37.8             | 24.5-53.3 | 0.02                     |
|                                                        | Canada        | 54.0             | 42.6-64.9 |                          |
|                                                        | England       | 65.8             | 55.6-74.7 |                          |
|                                                        | US            | 62.1             | 52.6-70.7 |                          |
| Quit duration                                          | > 2 years     | 55.8             | 46.6-64.6 | 0.19                     |
|                                                        | ≤ 2 years     | 64.0             | 55.8-71.5 |                          |
| Vaping might help me stay quit from smoking cigarettes |               |                  |           |                          |
| Vaping frequency                                       | Daily         | 93.0             | 89.3-95.4 | 0.29                     |
|                                                        | Weekly        | 87.9             | 71.4-95.5 |                          |
| Age                                                    | 18-39         | 89.0             | 81.2-93.8 | 0.16                     |
|                                                        | 40+           | 94.4             | 89.2-97.2 |                          |
| Sex                                                    | Female        | 95.4             | 90.7-97.8 | 0.04                     |
|                                                        | Male          | 89.3             | 83.4-93.3 |                          |
| Income                                                 | Low           | 93.6             | 86.0-97.2 | 0.22                     |
|                                                        | Moderate/high | 90.5             | 85.5-93.9 |                          |
|                                                        | Not reported  | 98.0             | 87.3-99.7 |                          |

| n=603         |               | % yes (weighted) | 95% CI    | P-value<br>(main effect) |
|---------------|---------------|------------------|-----------|--------------------------|
| Education     | Low           | 93.2             | 82.9-97.5 | 0.05                     |
|               | Moderate/high | 92.8             | 88.7-95.5 |                          |
|               | Not reported  | 56.1             | 19.5-87.1 |                          |
| Country       | Australia     | 95.2             | 85.5-98.5 | 0.71                     |
|               | Canada        | 89.6             | 79.8-95.0 |                          |
|               | England       | 92.7             | 85.4-96.5 |                          |
|               | US            | 92.7             | 86.1-96.3 |                          |
| Quit duration | > 2 years     | 92.5             | 86.5-95.9 | 0.93                     |
|               | ≤ 2 years     | 92.2             | 87.2-95.3 |                          |

CI: Confidence interval. US: United States. P-value is the main effect of each variable in the model (analysis of effects). Results should be interpreted with caution due to small sample sizes (resulting in wide confidence intervals).
